# Supplementary material
Source: Springer Nature journal article supplement (https://www.springermedizin.de/resource/supplementary/12935_2009_235_MOESM8_ESM.pdf/9540190)
Supplement: MOESM8 [file 9540190]

# DNA Damage Response

## Extracellular Matrix Reorganization

A Result of Lge T Ag or of 3MC?

Neovascularization/Angiogenesis Expression  
Pro-metastatic expression

Response to Lge T Antigen integration  
or need to repair in face of (-) p53

## Signal Transduction

MAPK pathway activation  
JAK/STAT pathway activation  
ras signalling activation (why?)

## AntiViral Responses

multiple caspase activation  
2'-5' OAS  
Cleave viral proteins  
Apoptotic  
Prevents viral replic'n

TRICK2A  
IAP3  
HSIAH2  
IRRCP + DAP1  
TRAIL3

PKR  
Block tx, tl'n  
of viral mRNA's  
& proteins  
Apoptotic

MXA, MXAB  
Block tx, tl'n  
of viral mRNA's  
& proteins

## Increased/Enhanced Antigen Presentation

## Recruitment of B-, T-cells ("SOS")

## Pro-Viral Responses

Large T Antigen-mediated

## Blockage of Anti-Proliferative Signals

pRB binding blocks cell cycle arrest, enables tx of cell prolif. genes

PML Bodies: SP100  
ND10  
function??

Initiation of viral tx, tl'n.

IFN $\gamma$  Desensitization  
↓ Jak2  
↓ IFN $\gamma$  receptor

## Viral Oncogenesis & 3MC Tumorigenesis

Activation of Oncogenes  
Inactivation of tsg's  
Increased GF expression

## Blockage of Apoptosis Response

via p53 binding & inactivation

### Result:

- Immortalized: balance of birth/death shifted in favor of proliferation
- tumorigenic/metastatic
- vacuolation & vacuolating pathogenesis sometimes observed
